# Supplementary material
Source: PubMed Central journal article supplement (PMC4803540)
Supplement: NIHMS760107-supplement-Supplementary_figures.pdf [file NIHMS760107-supplement-Supplementary_figures.pdf]

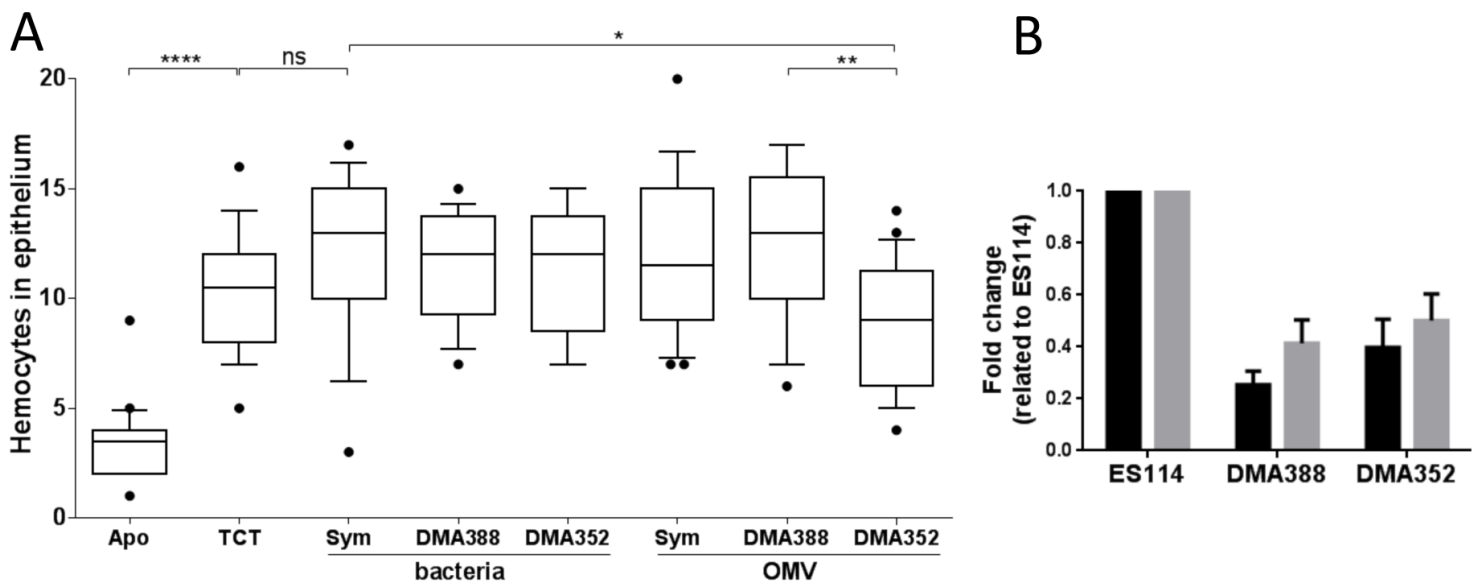

**Fig. S1.** *Vibrio fischeri* mutants that are either over- (DMA352) or under- (DMA388) producers of TCT still induce hemocyte trafficking. (A) Quantification of the level of hemocyte trafficking counting. Animals were exposed to  $10^4$  cfu of each strain (per mL) or 100  $\mu$ g of OMV (per mL) produced by these strains, or 1  $\mu$ M of TCT. (B) Relative change ( $n$ -fold) in OMV production compared to wild-type strain based on either protein (grey) or lipid (black) quantification.

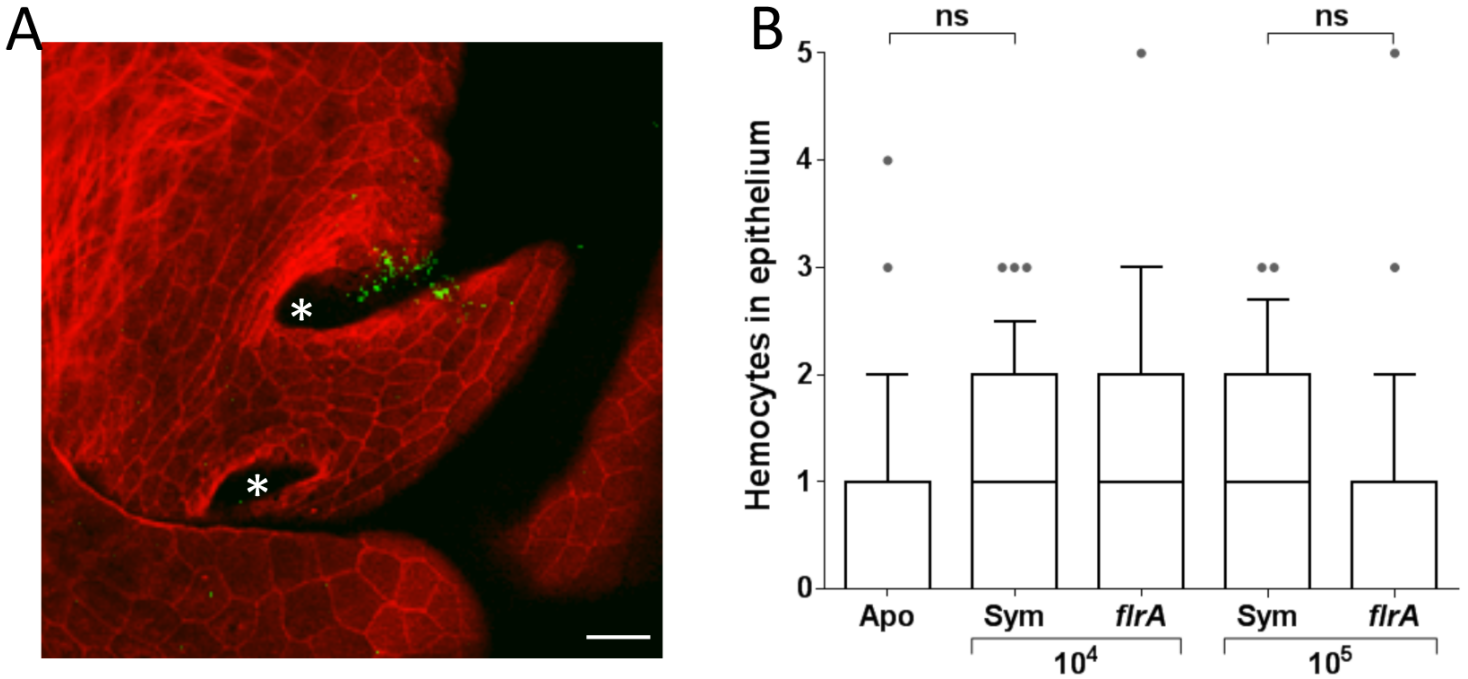

**Fig. S2.** Induction of full hemocyte trafficking. **(A)** Confocal micrograph of one appendage of a juvenile light organ after a 3-h exposure to  $10^5$  cfu *flrA* per mL, indicating that the bacteria are still outside the pores (green) bacteria (GFP-labeled); red, rhodamine phalloidin (filamentous actin). \* indicate two visible pores; scale bar = 20  $\mu$ m. **(B)** Level of inoculum does not significantly affect the degree of hemocyte trafficking by 3 h. To quantify hemocyte trafficking, 30 animals were exposed to either  $10^4$  or  $10^5$  *V. fischeri* cfu/mL for 3 h. One-way ANOVA analysis of differences: (ns), not significant.
